# Supplementary material for: The Effect of Different Photoperiods in Circadian Rhythms ofPer3Knockout Mice
Source: Hindawi journal article supplement (doi:10.1155/2014/170795), 2014-01-01

## Supplemental Material

Periodograms were constructed for each animal in all light conditions. The animals are labelled 1-12. All periodograms and double plotted actograms of running wheel activity are shown below, together with the number of the corresponding animal.

### Animal 1.

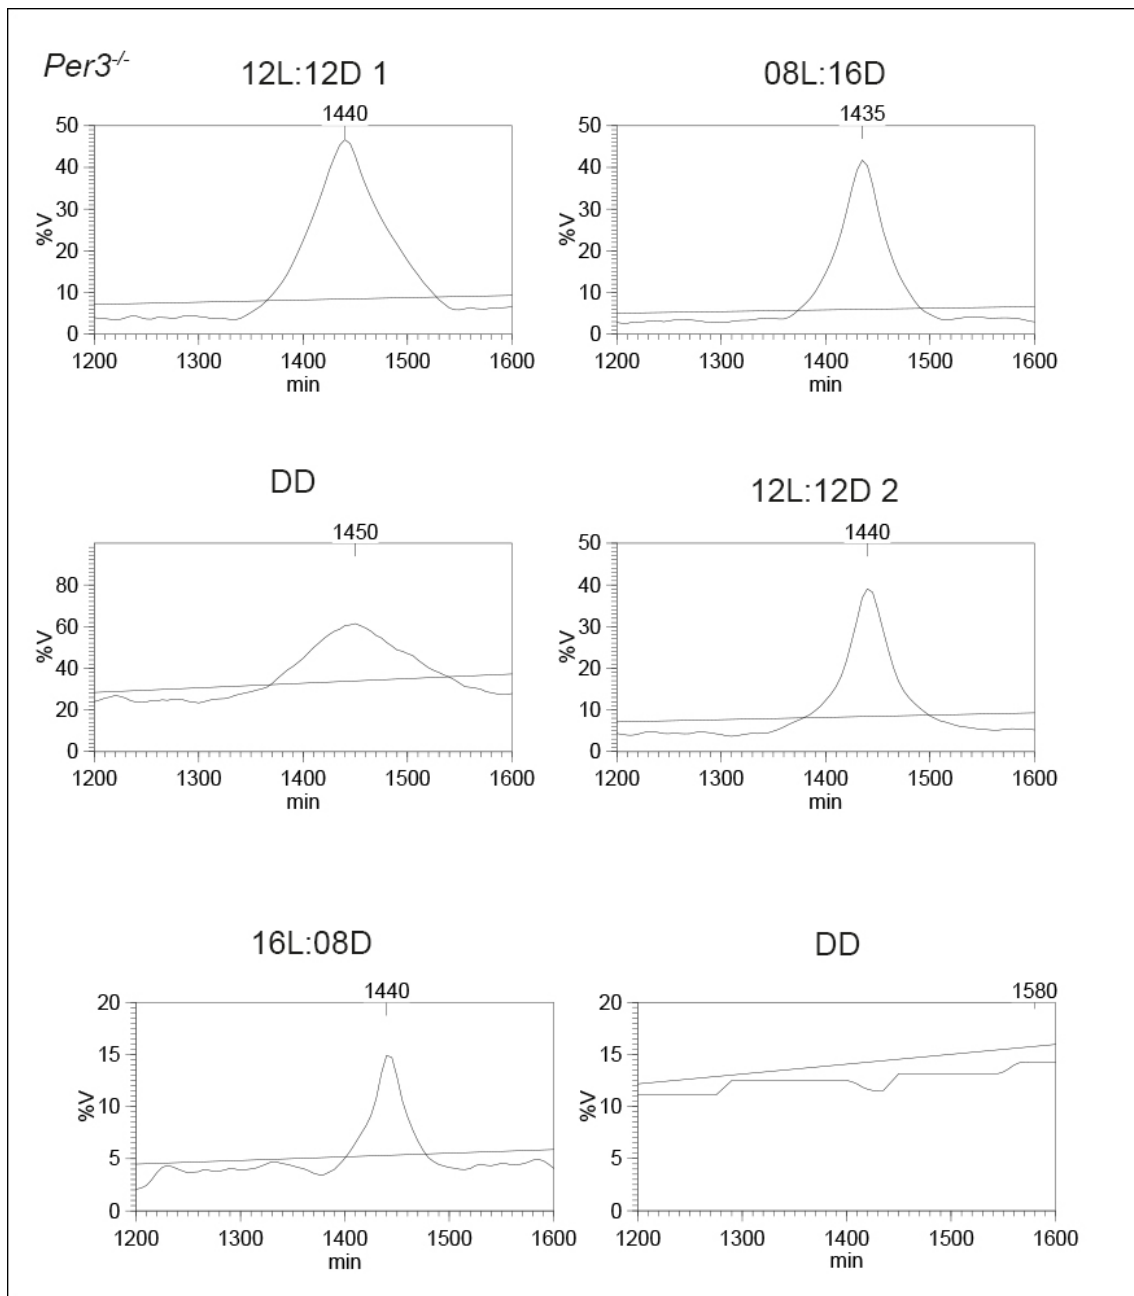

Animal 1

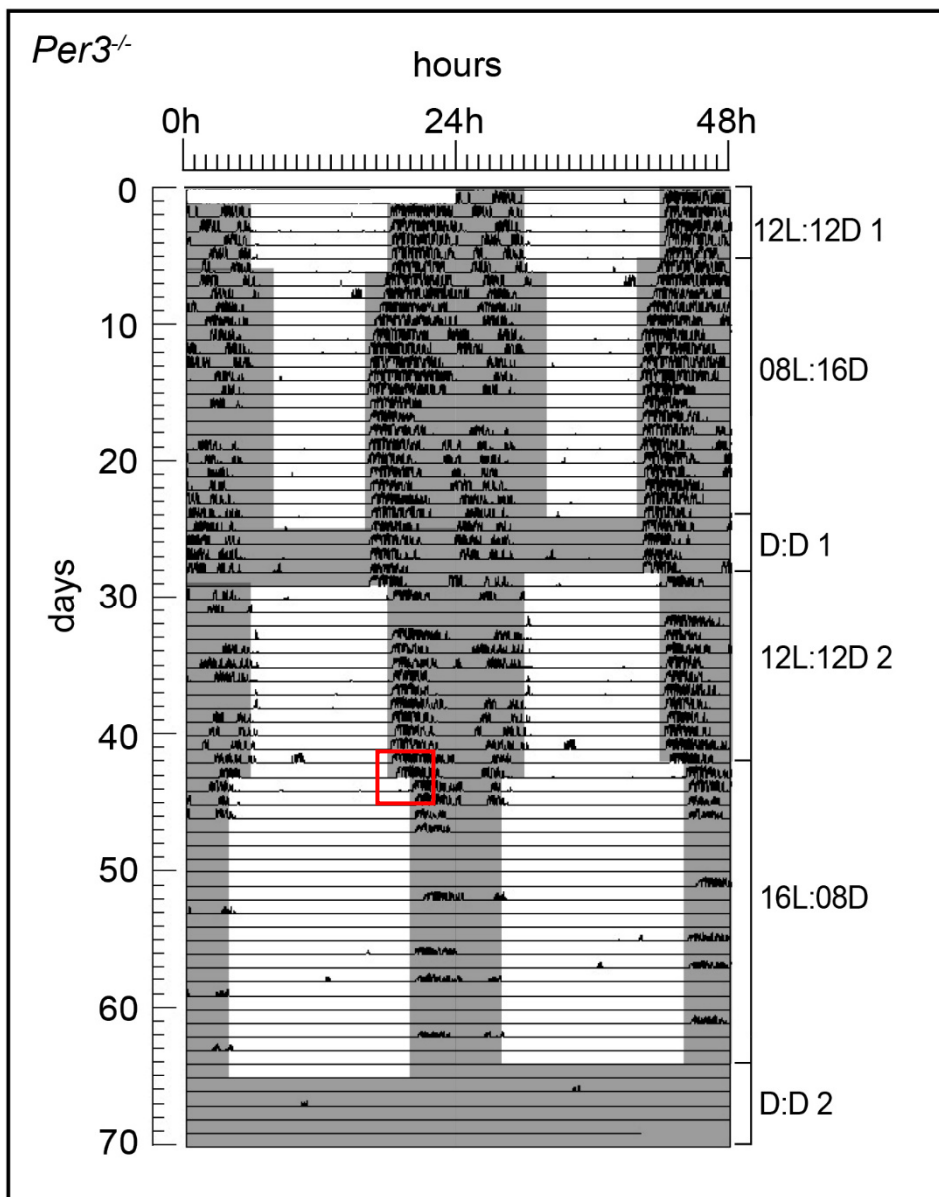

## Animal 2.

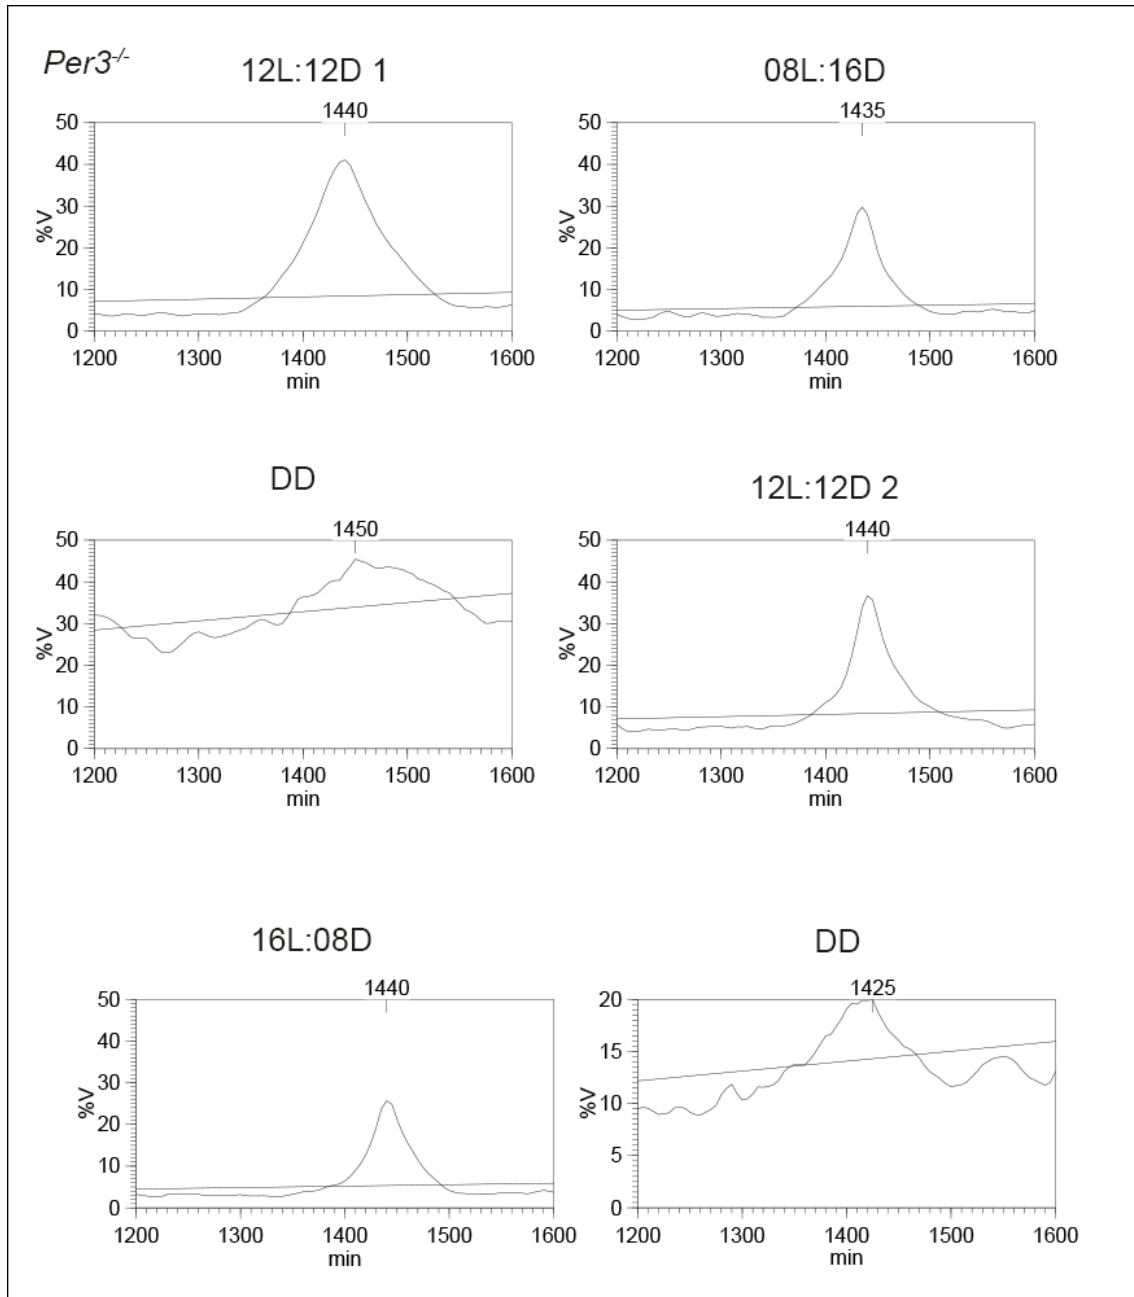

Animal 2

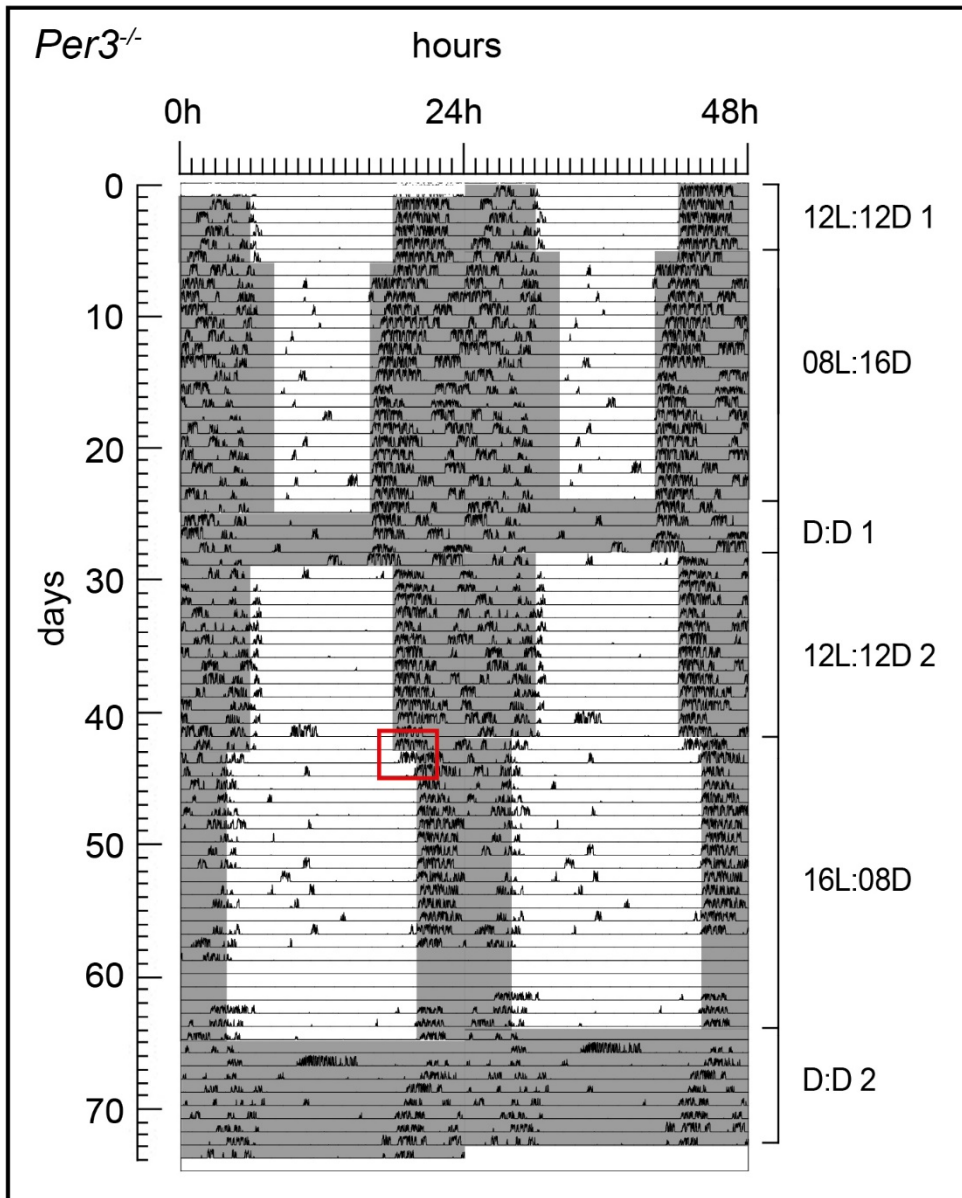

### Animal 3

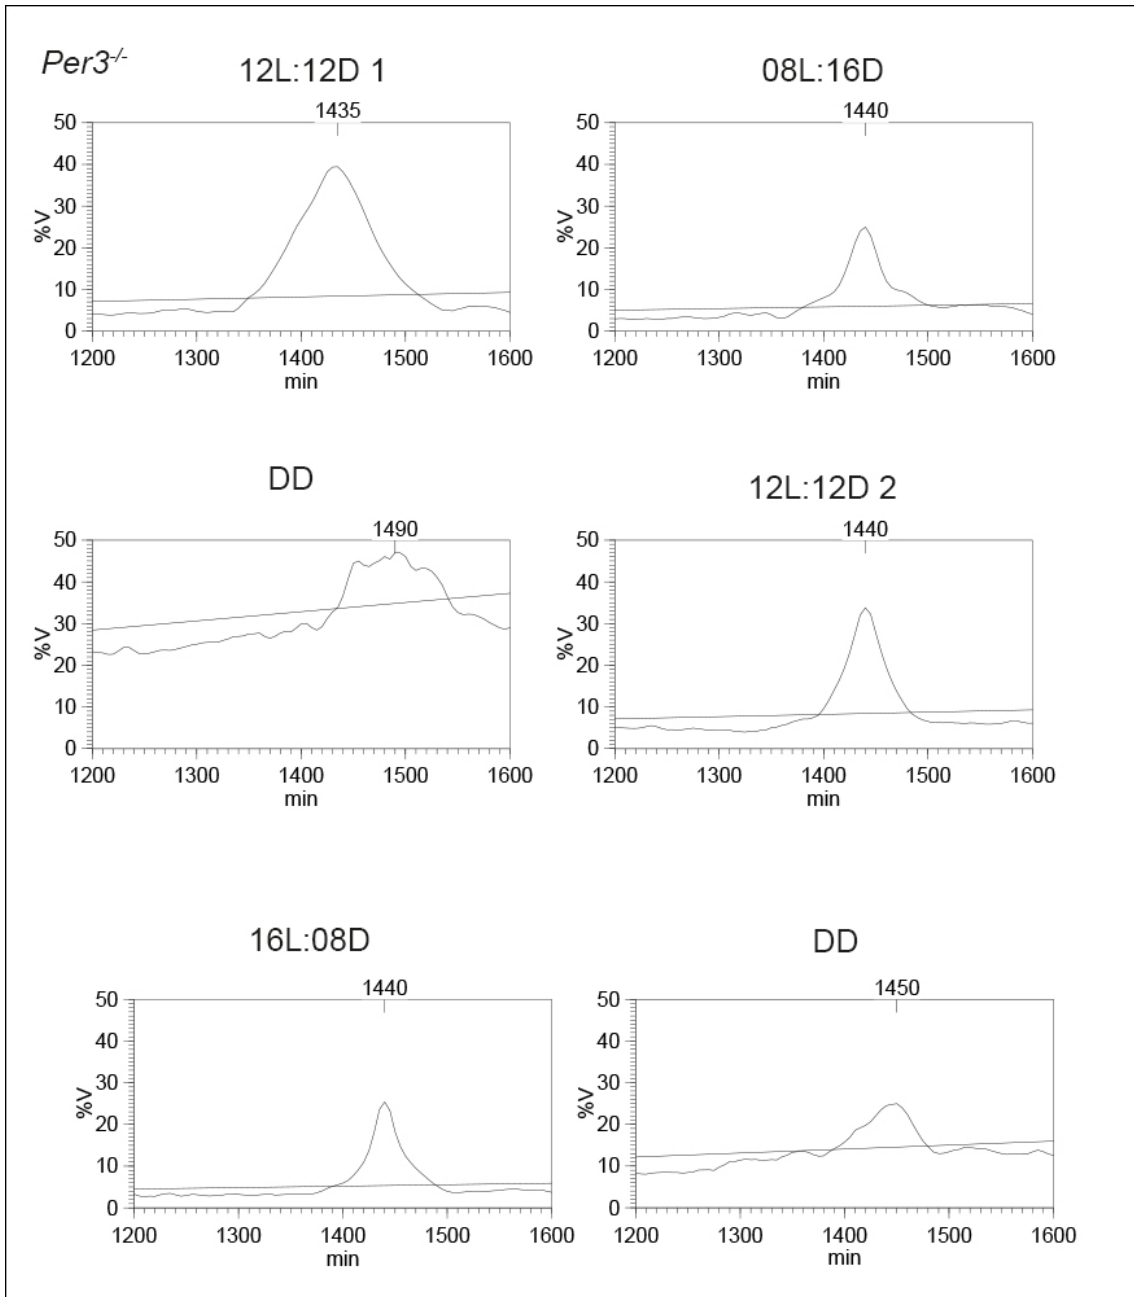

Animal 3

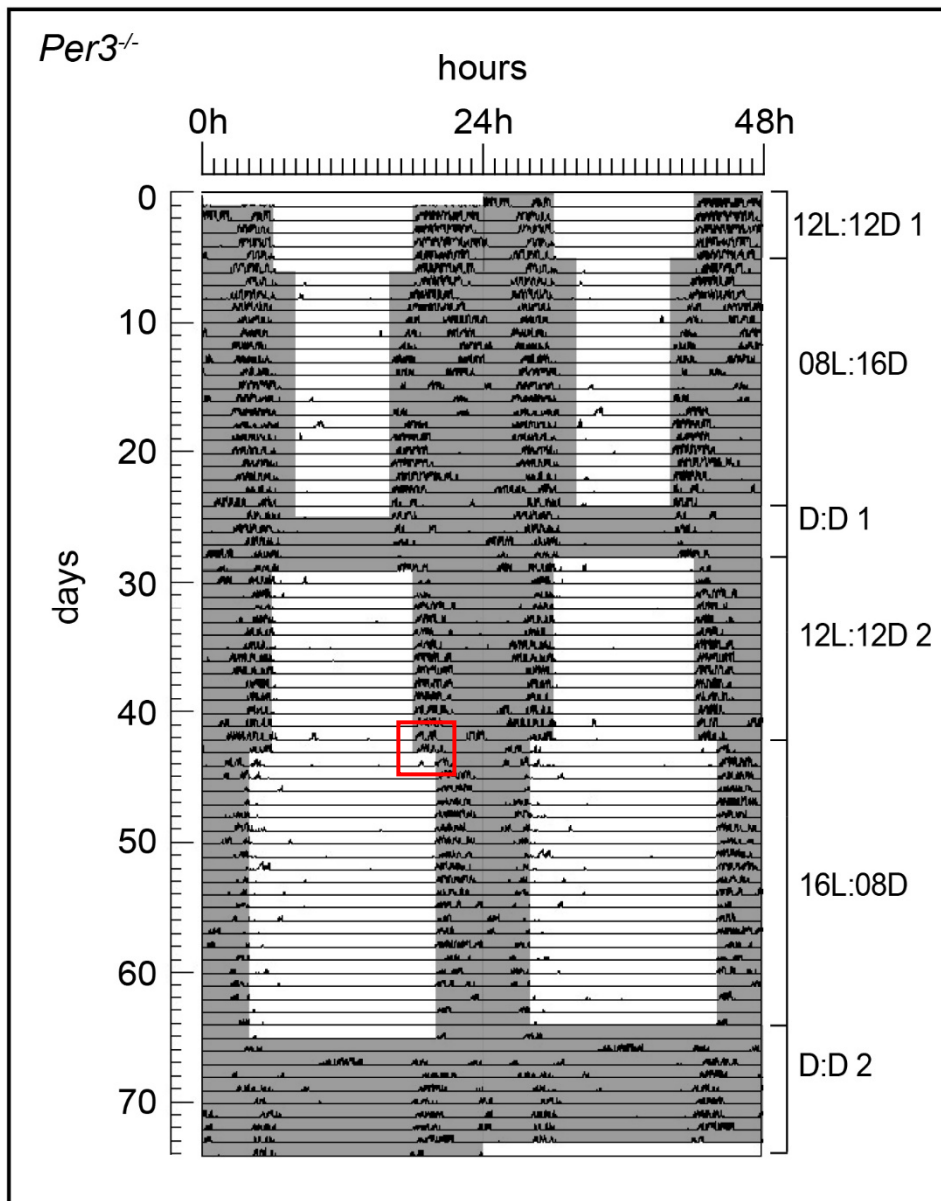

**Animal 4.**

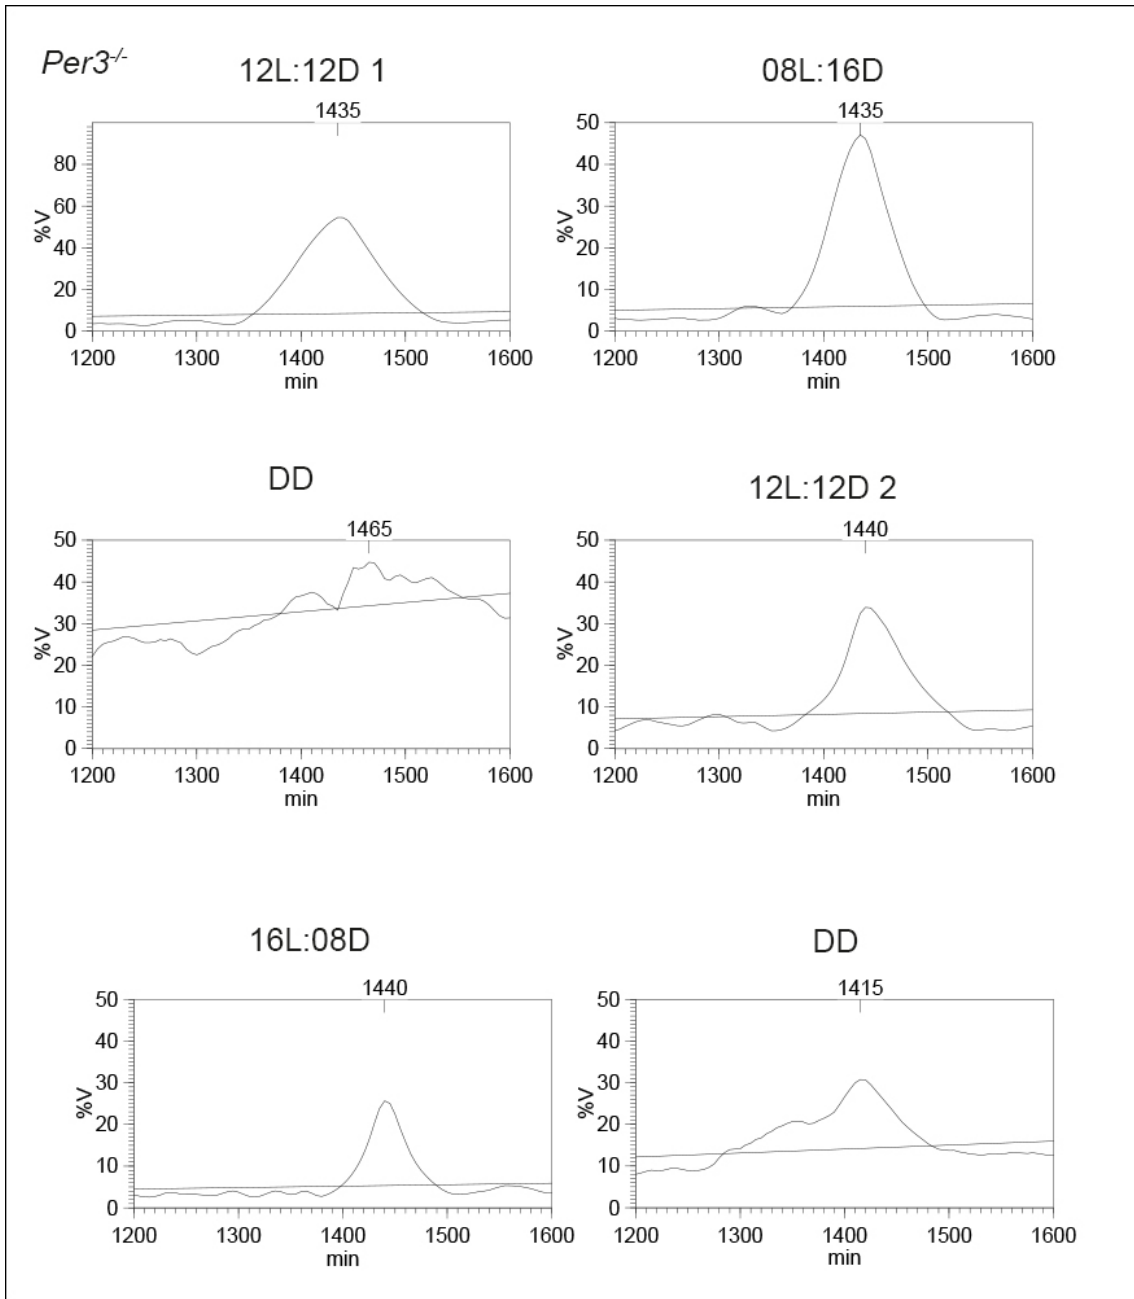

Animal 4

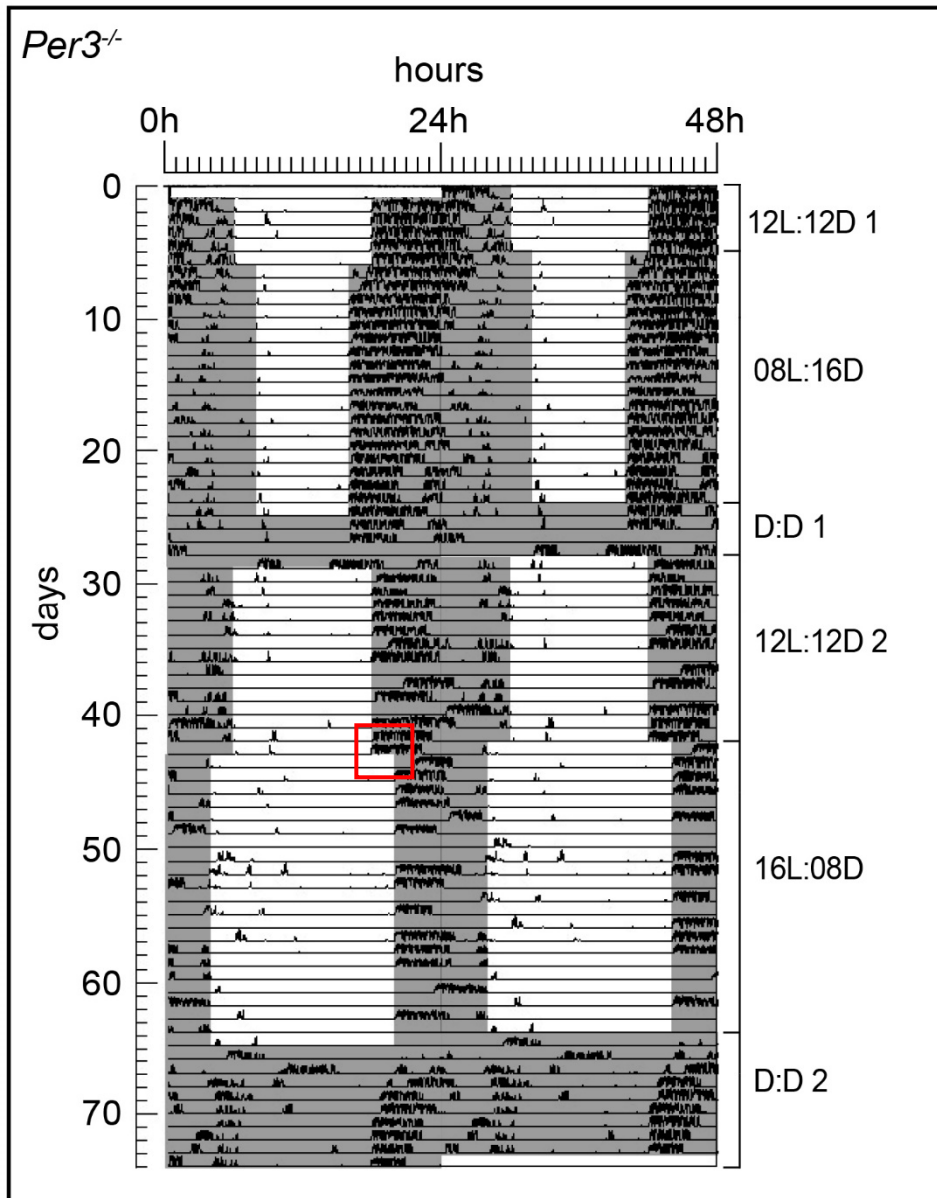



# Animal 5

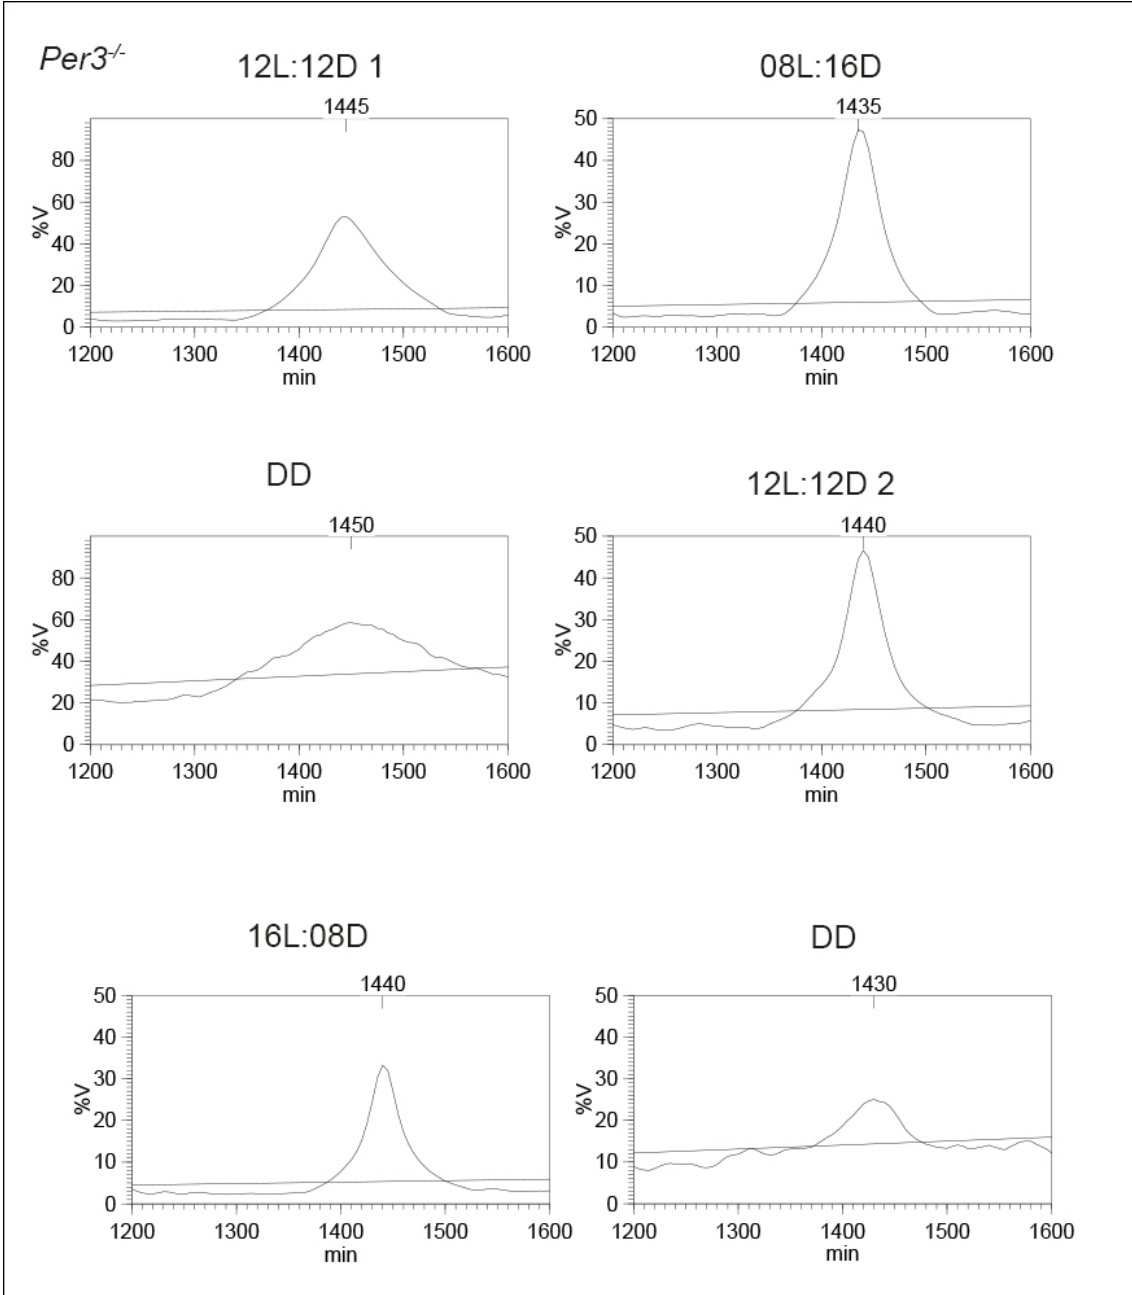

Animal 5

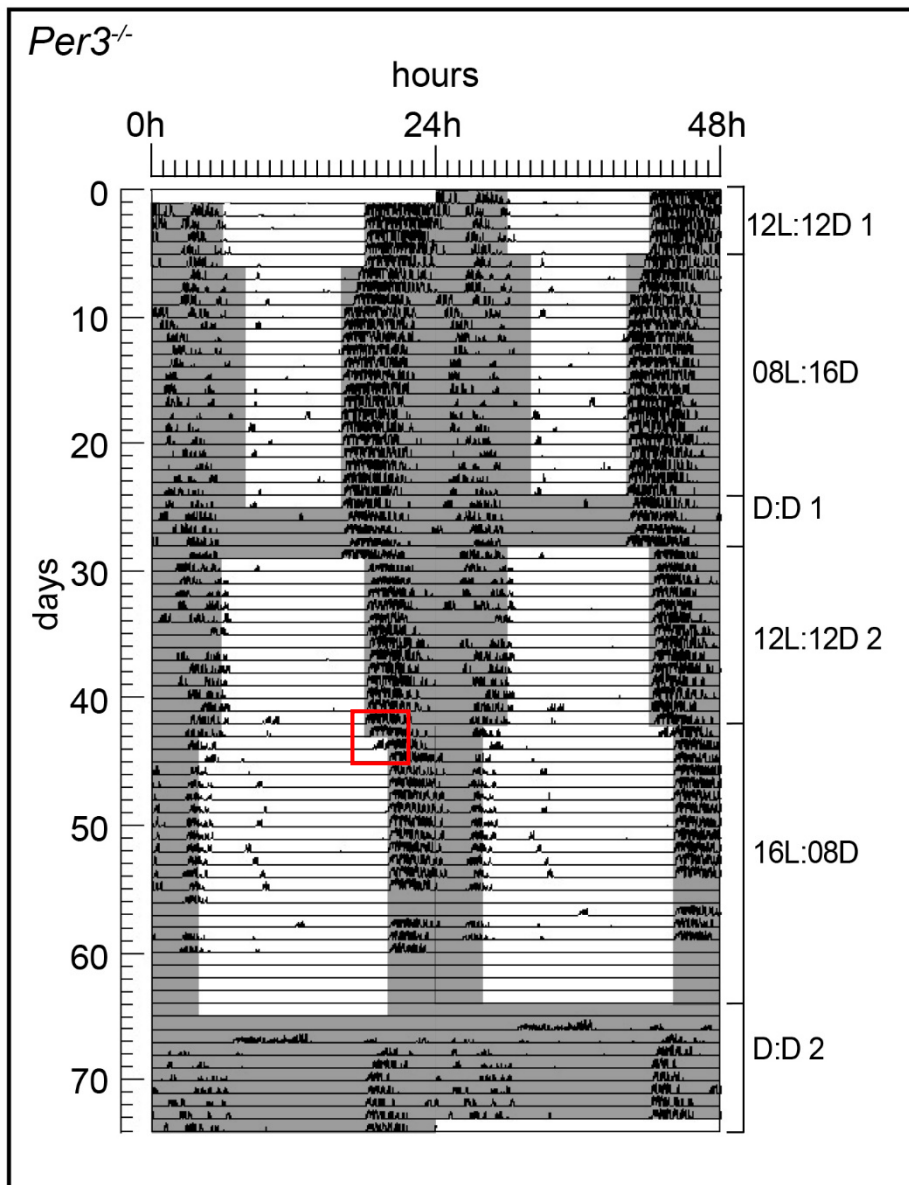

**Animal 6.**

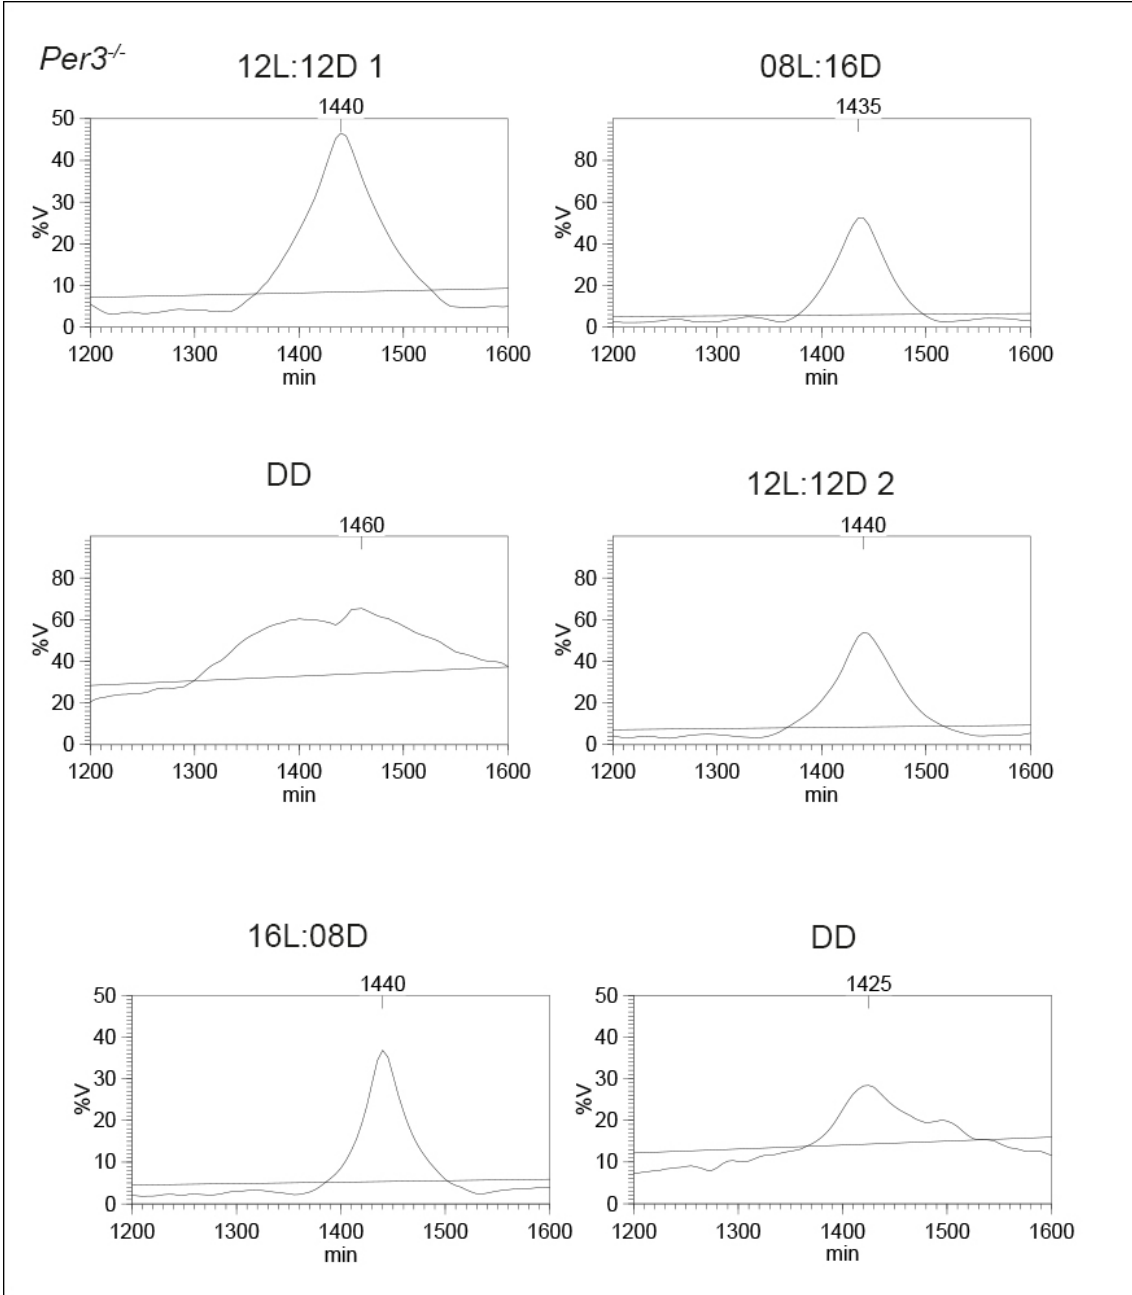

Animal 6

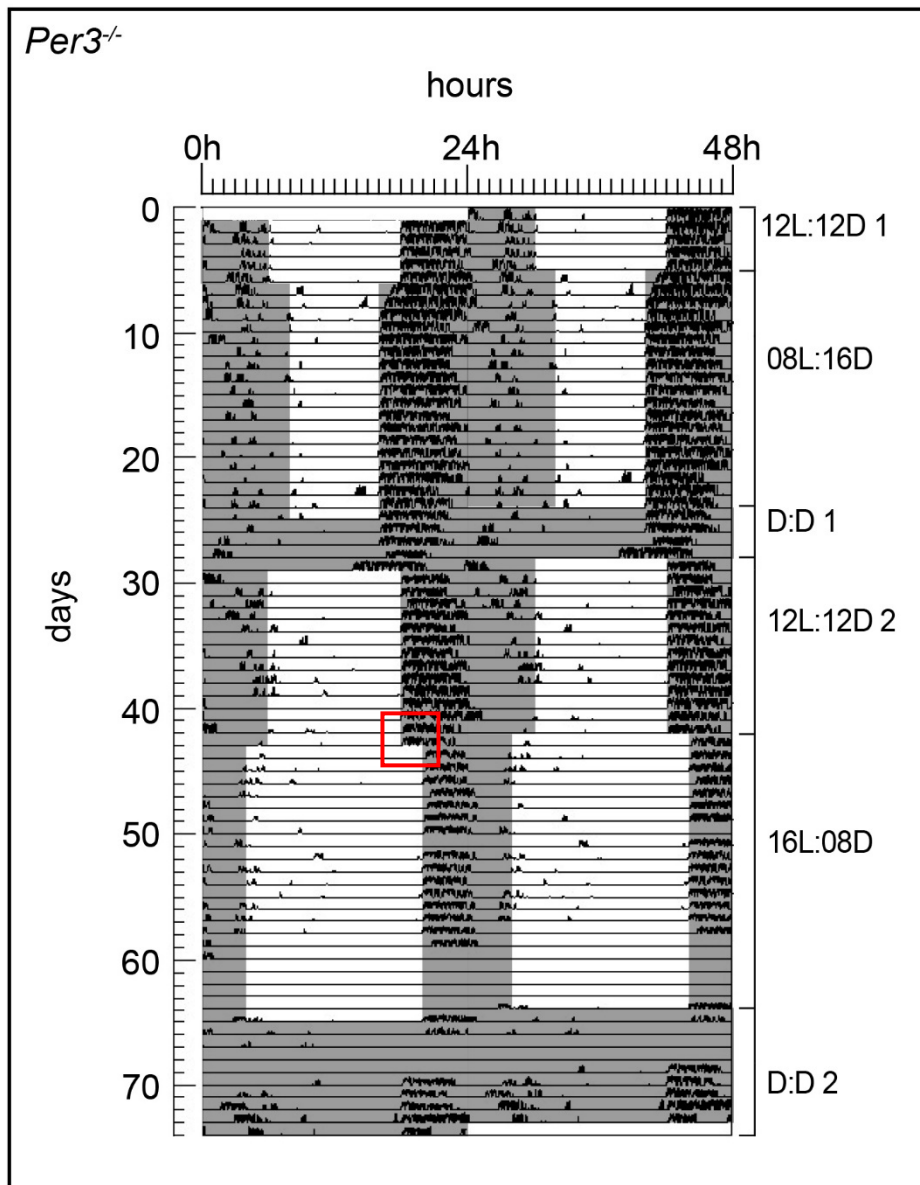

## Animal 7.

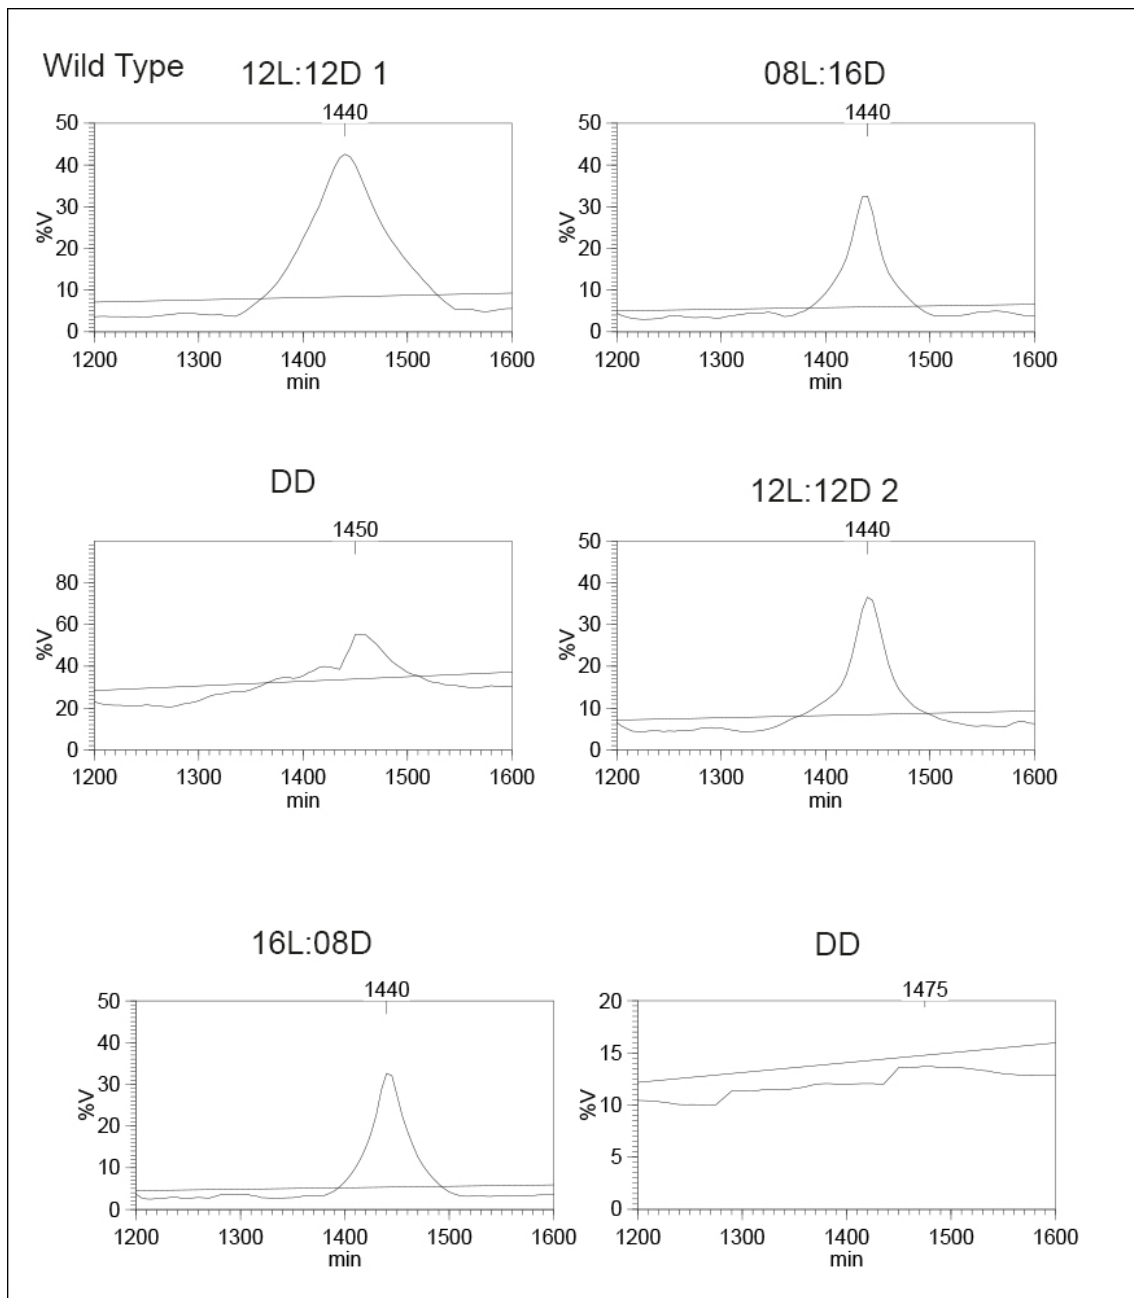

# Animal 7

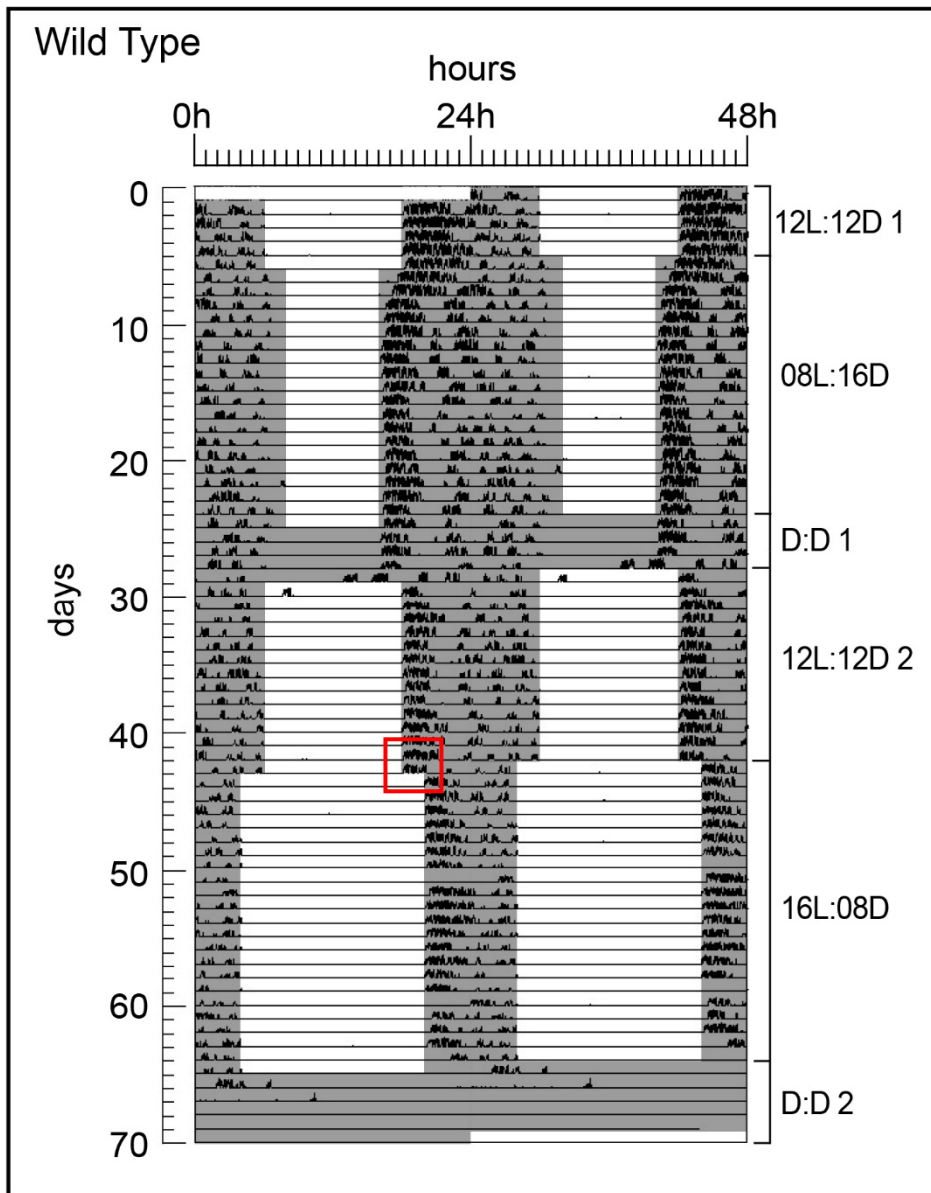

**Animal 8.**

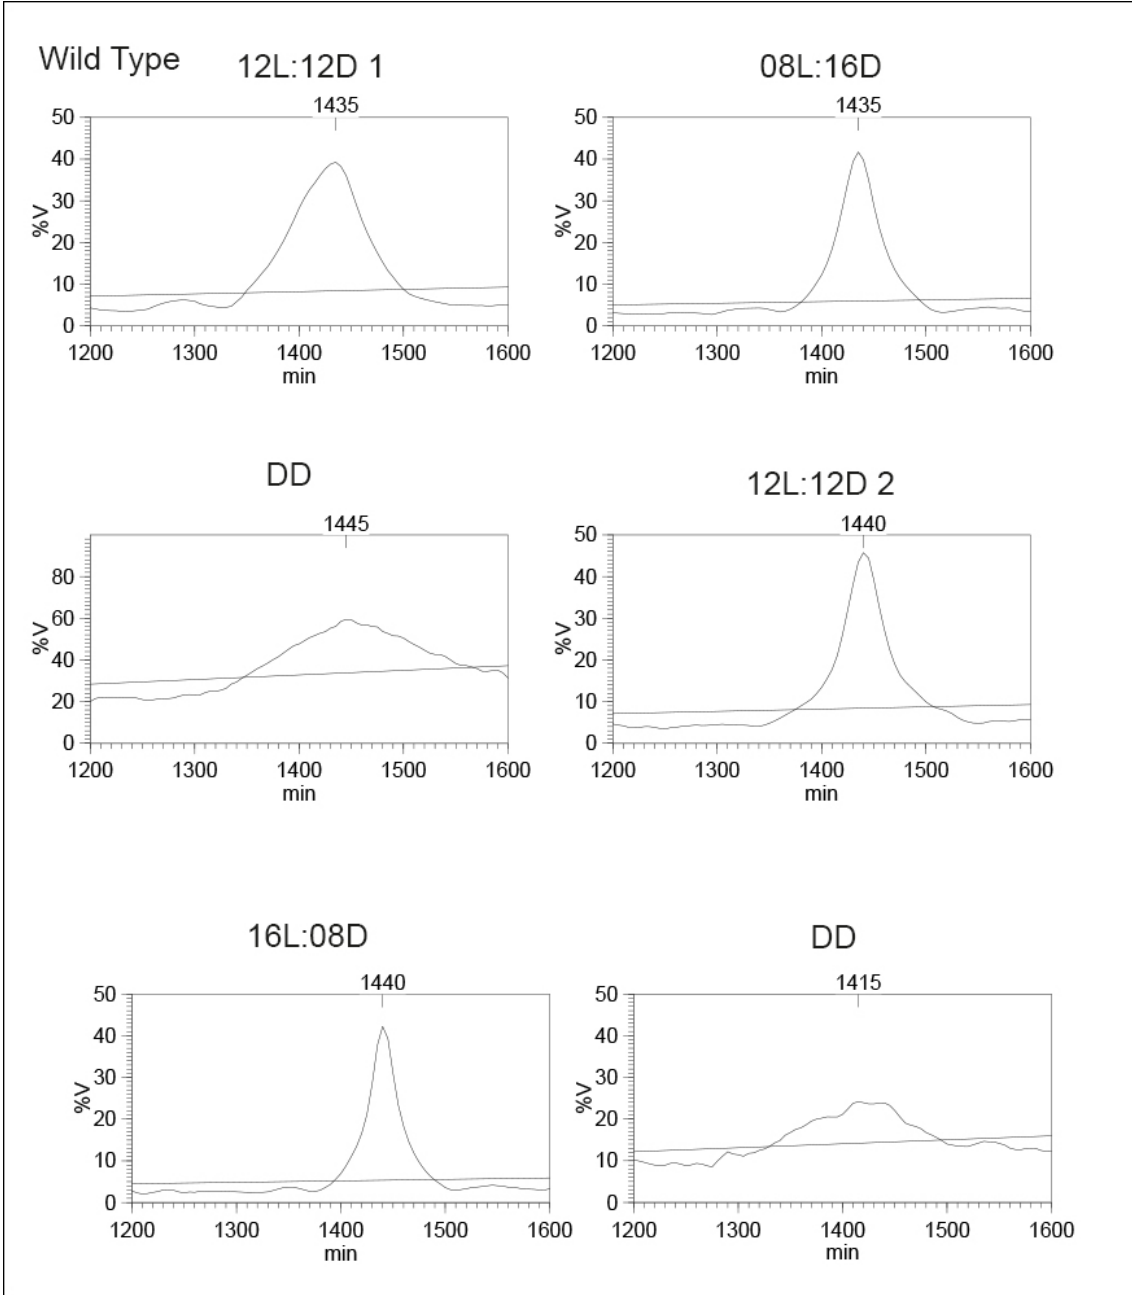

# Animal 8

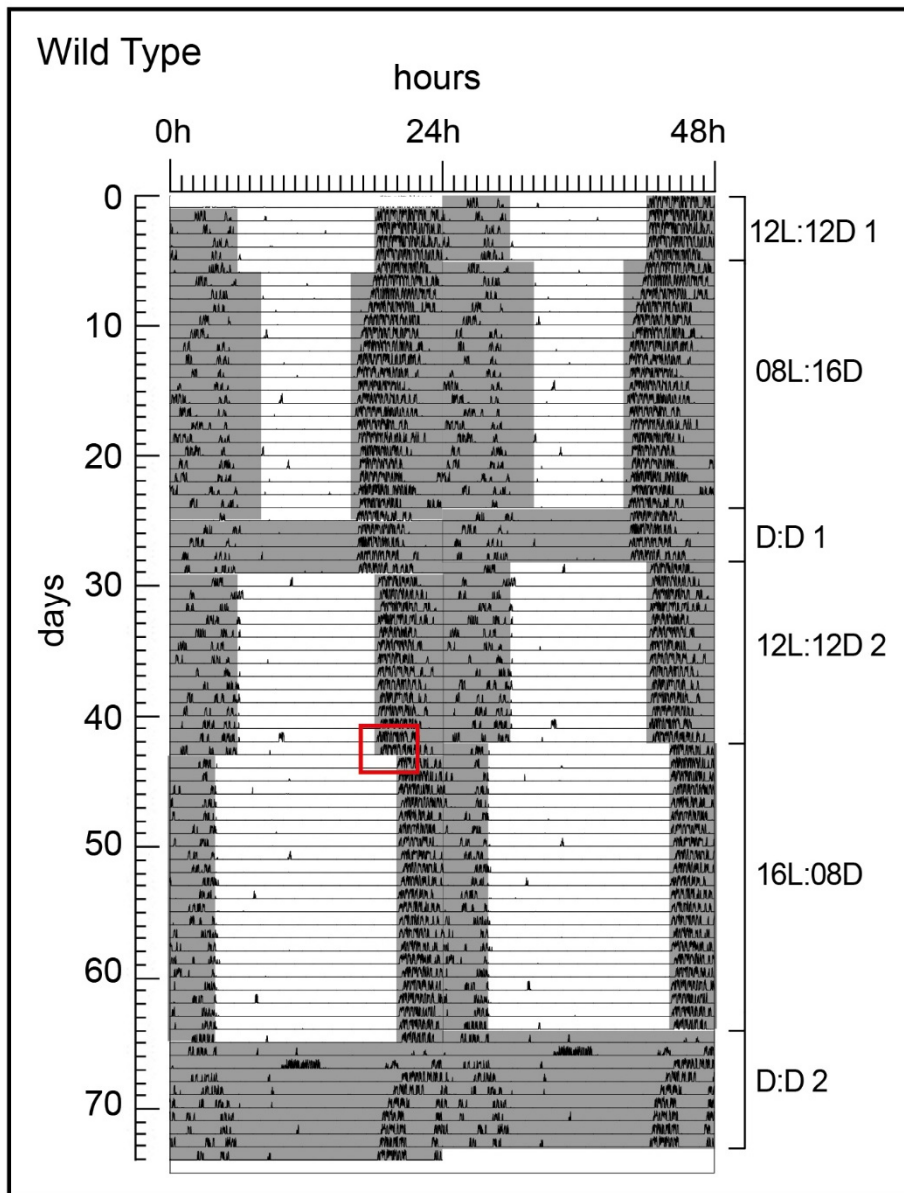



**Animal 9.**

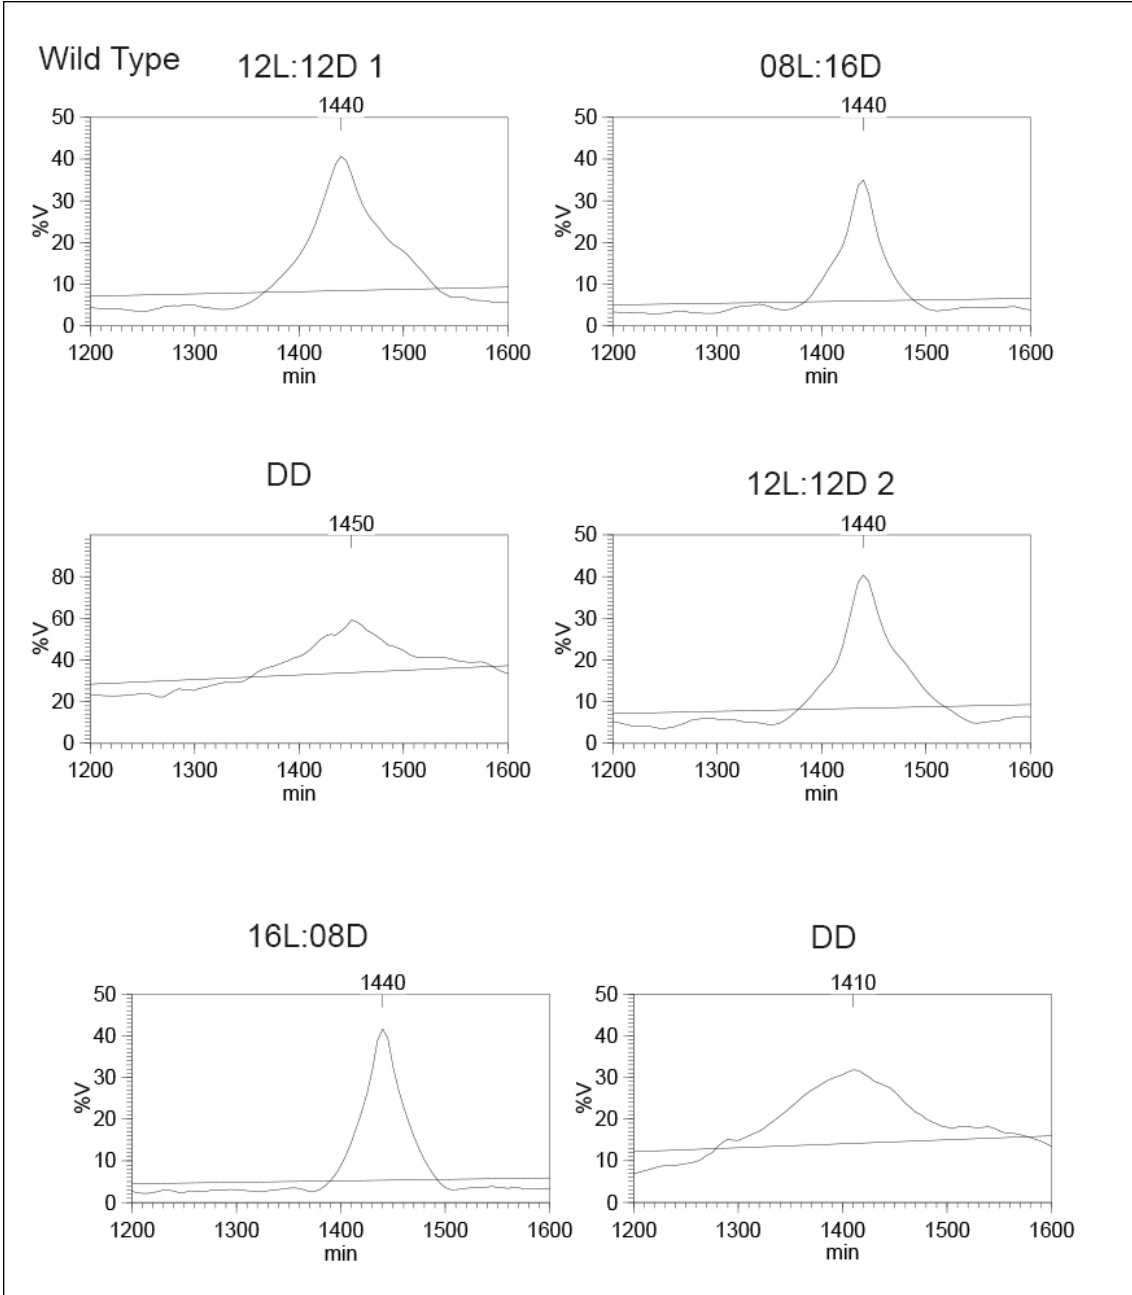

Animal 9

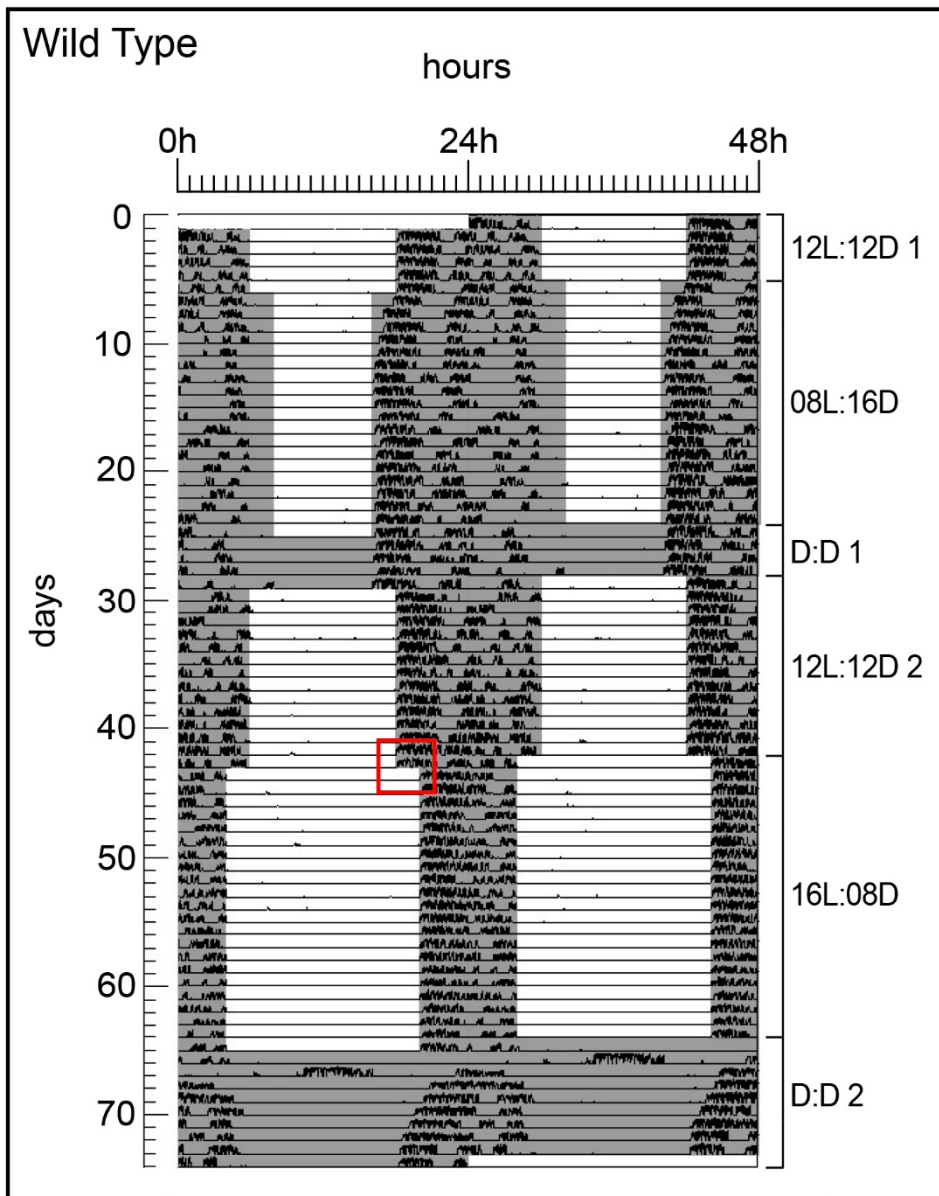

**Animal 10.**

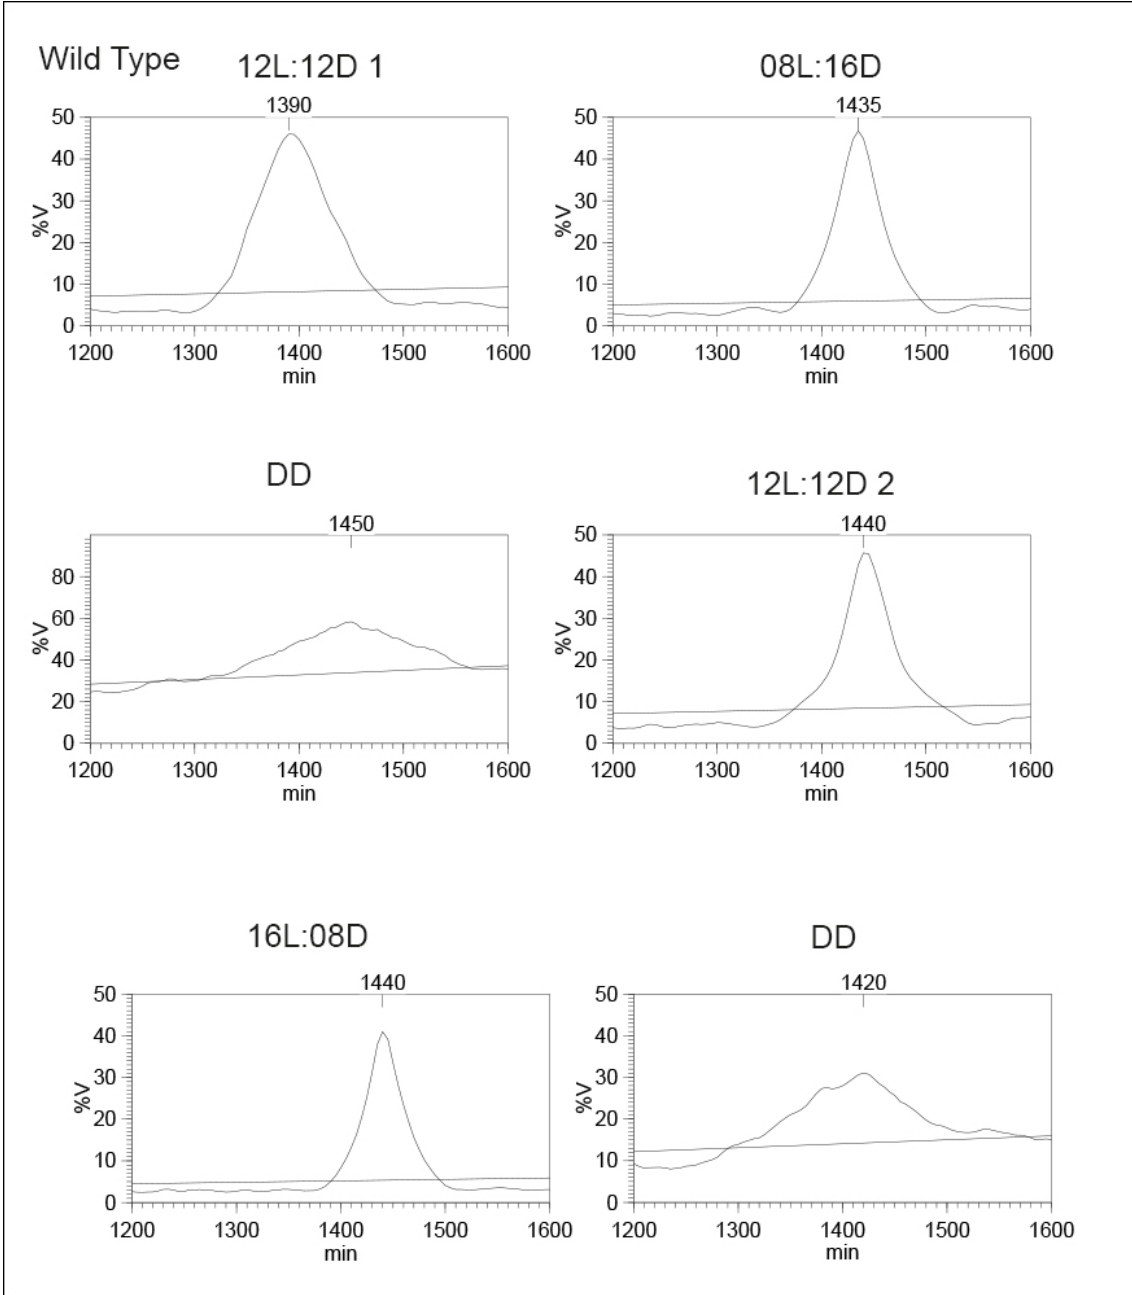

Animal 10

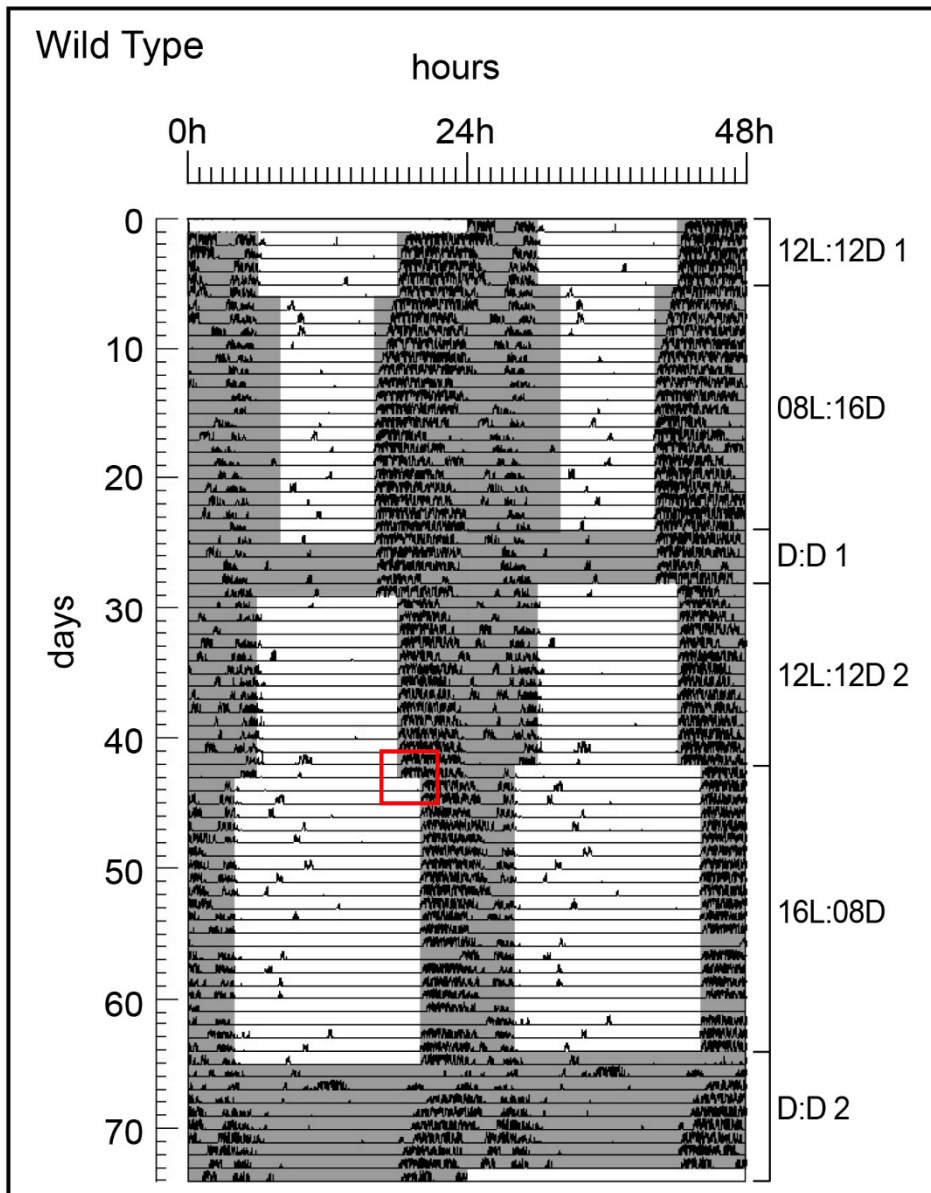

**Animal 11.**

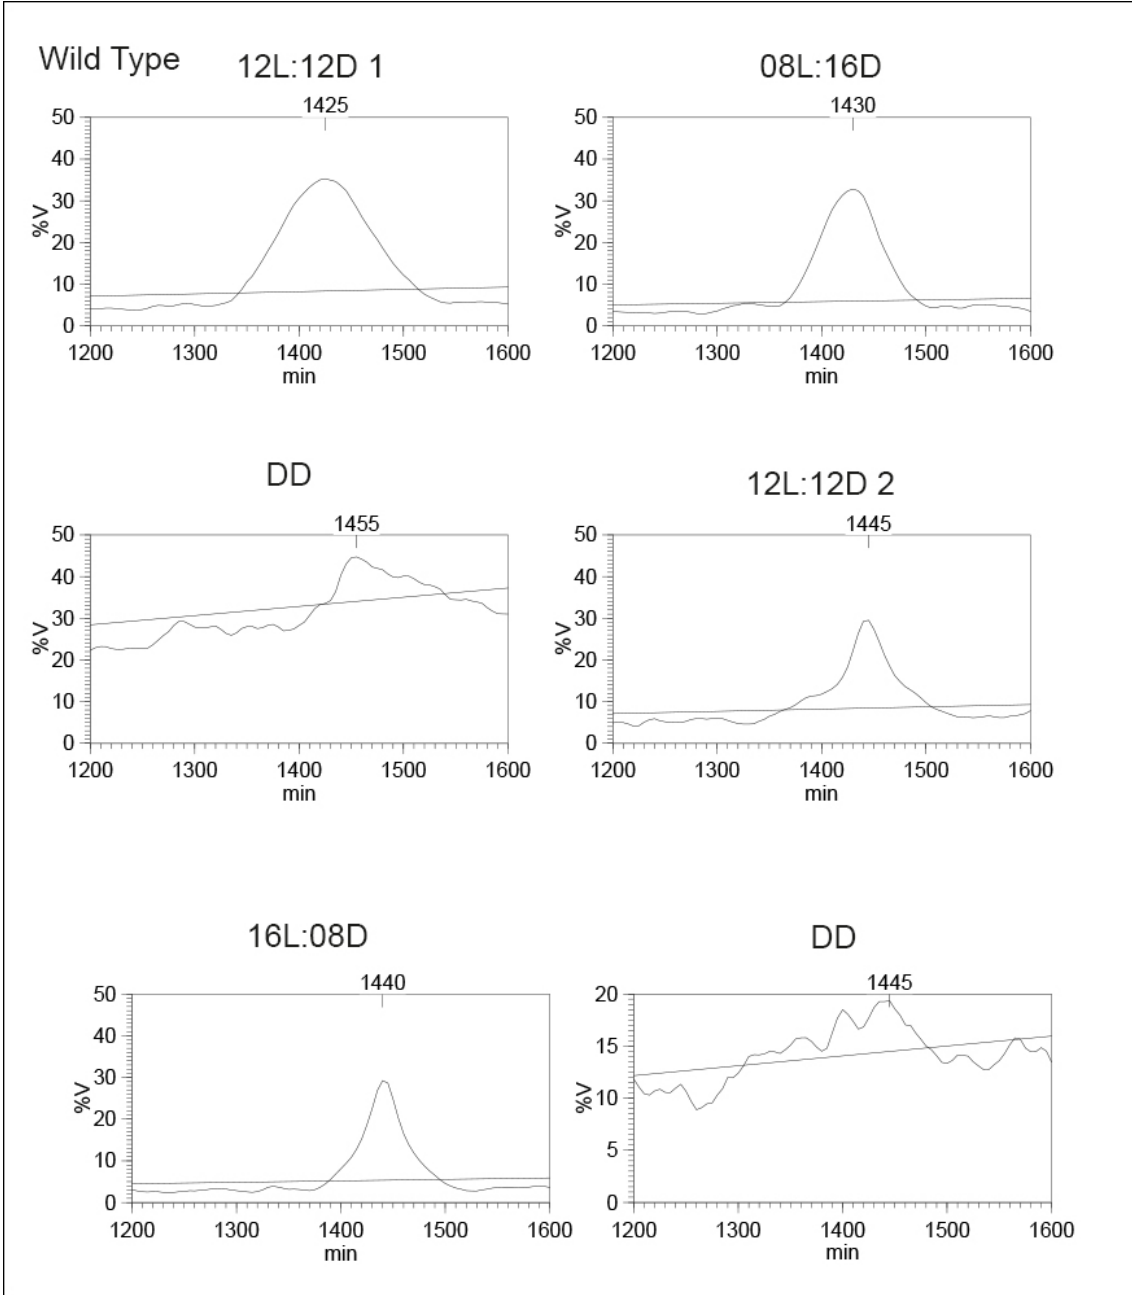

# Animal 11

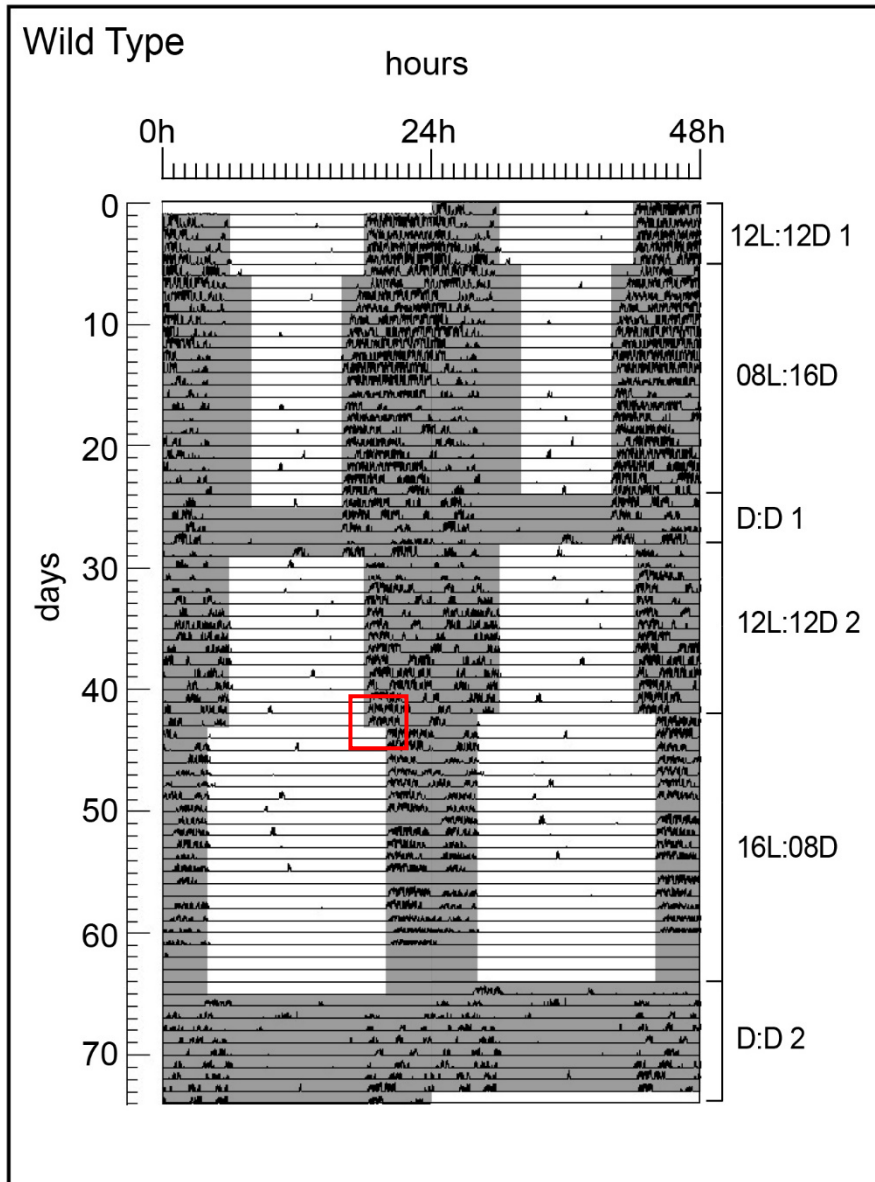

**Animal 12.**

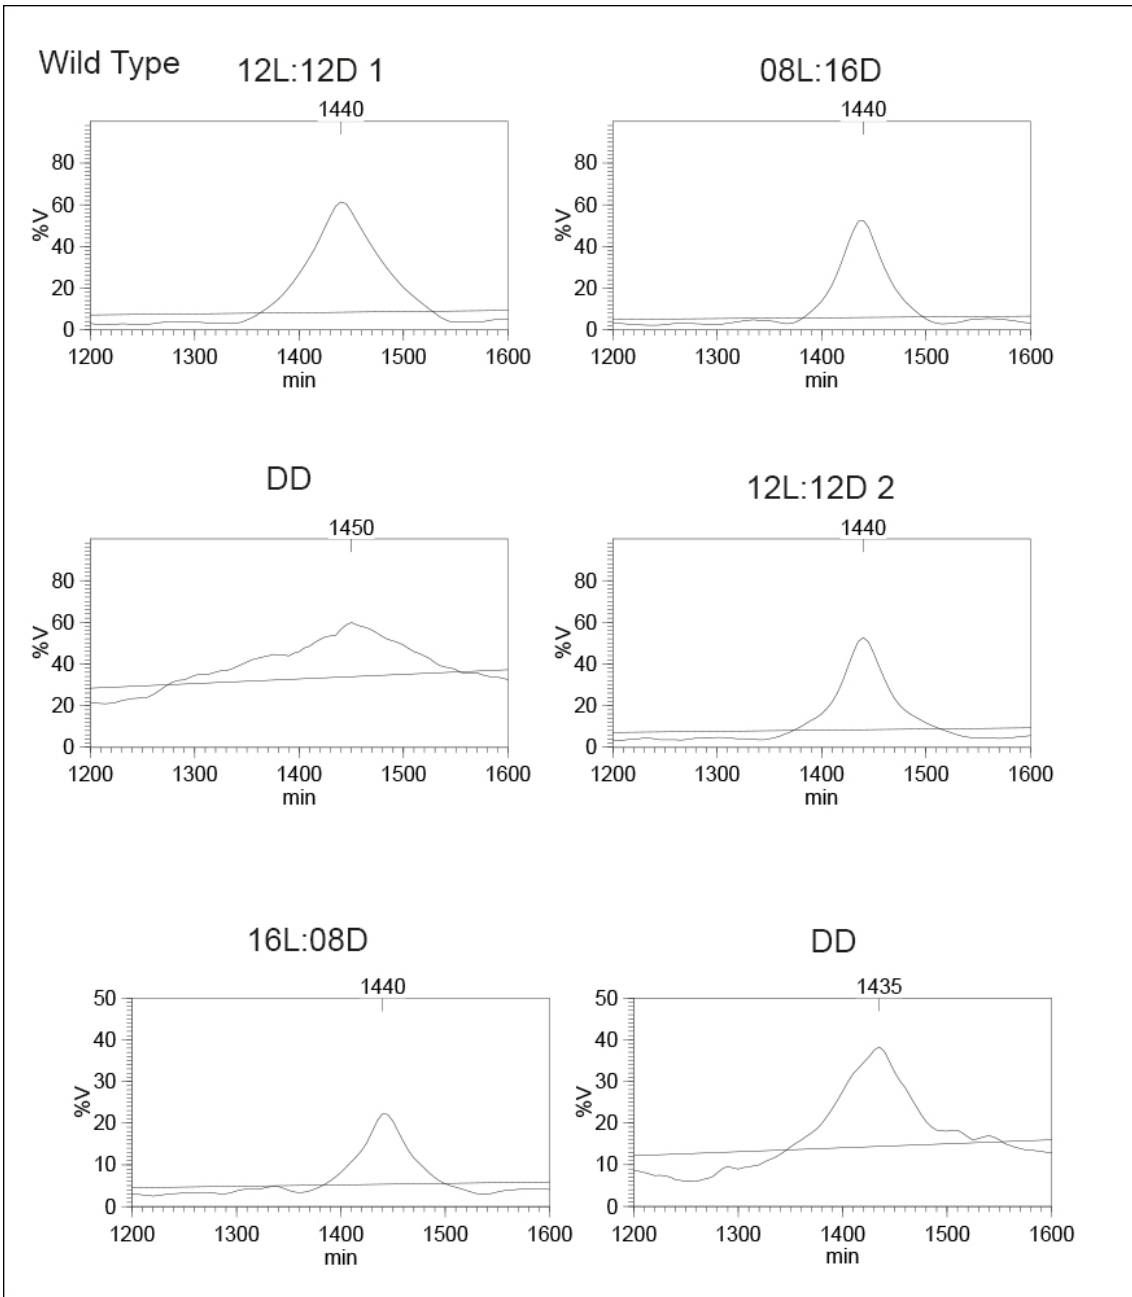

# Animal 12

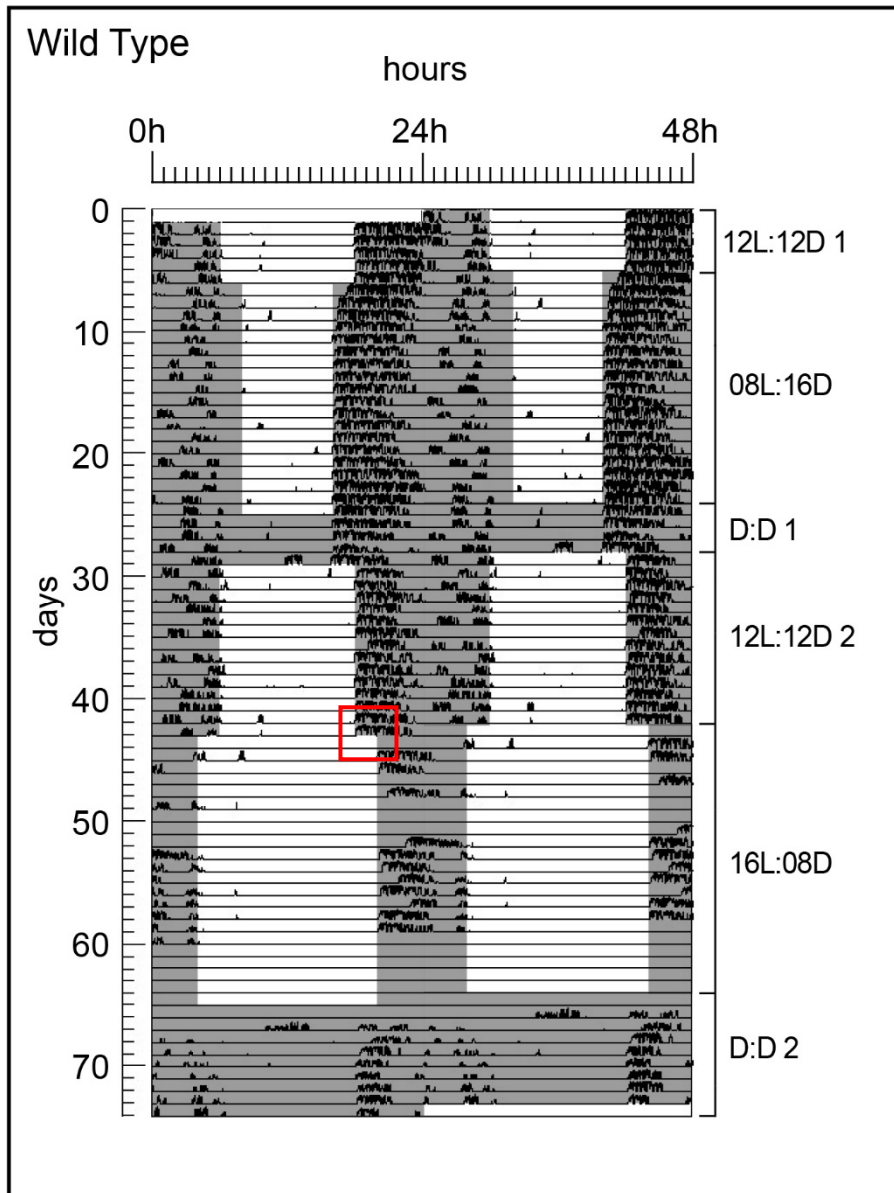

Supplement: f1 [file 170795.f1.pdf]
